# Supplementary material for: Integration of pharmacists’ knowledge into a predictive model for teicoplanin dose planning
Source: bioRxiv or medRxiv preprint supplement (doi:10.1101/2023.12.14.23299934), 2023-12-17
Supplement: Supplementary file [file media-1.pdf]

Figure S1

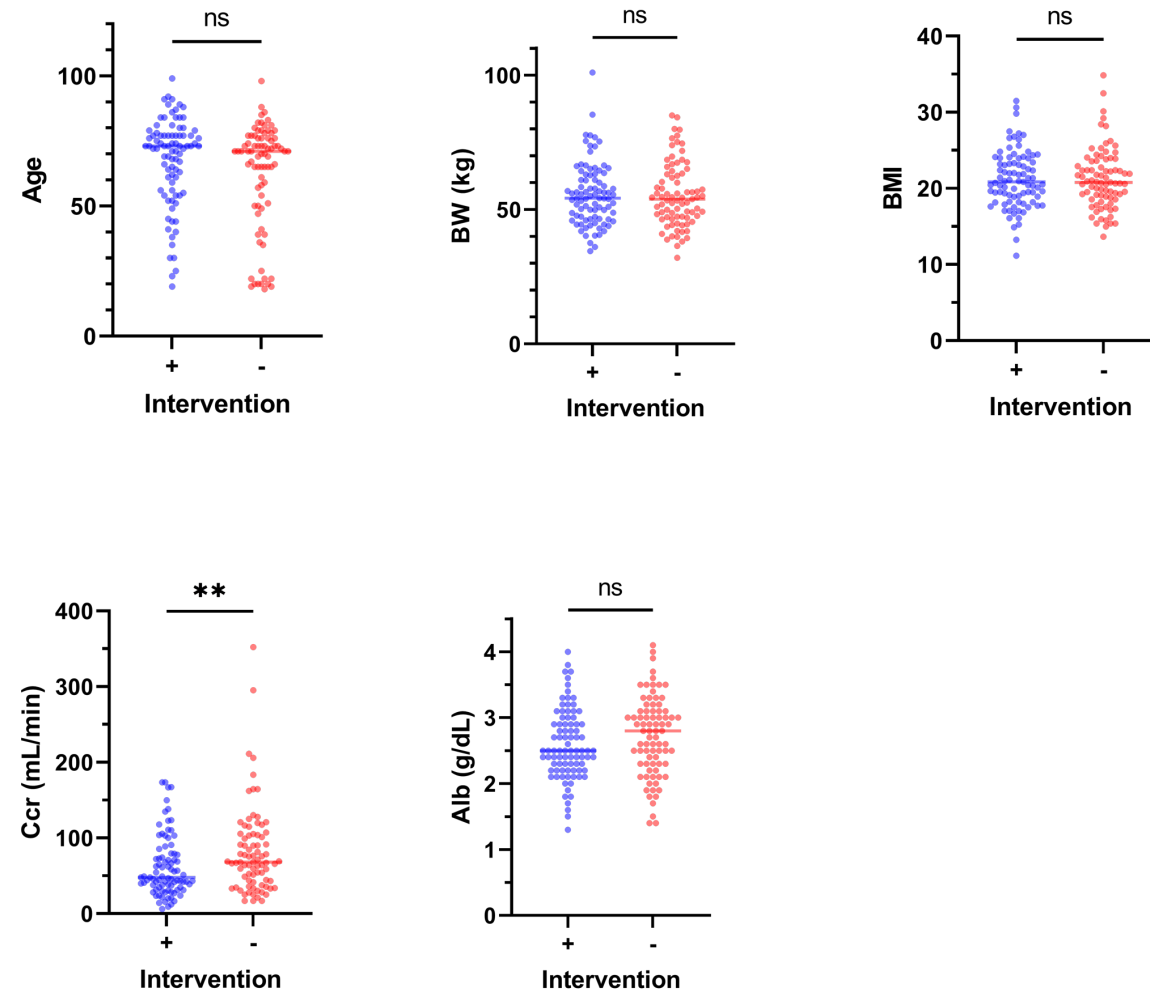

**Figure S1.** Baseline characteristics of patients without ICU/HCU stay included in the analysis of target attainment (\*\* $p < 0.01$ , ns. not significant). See also Table 3.

Figure S2

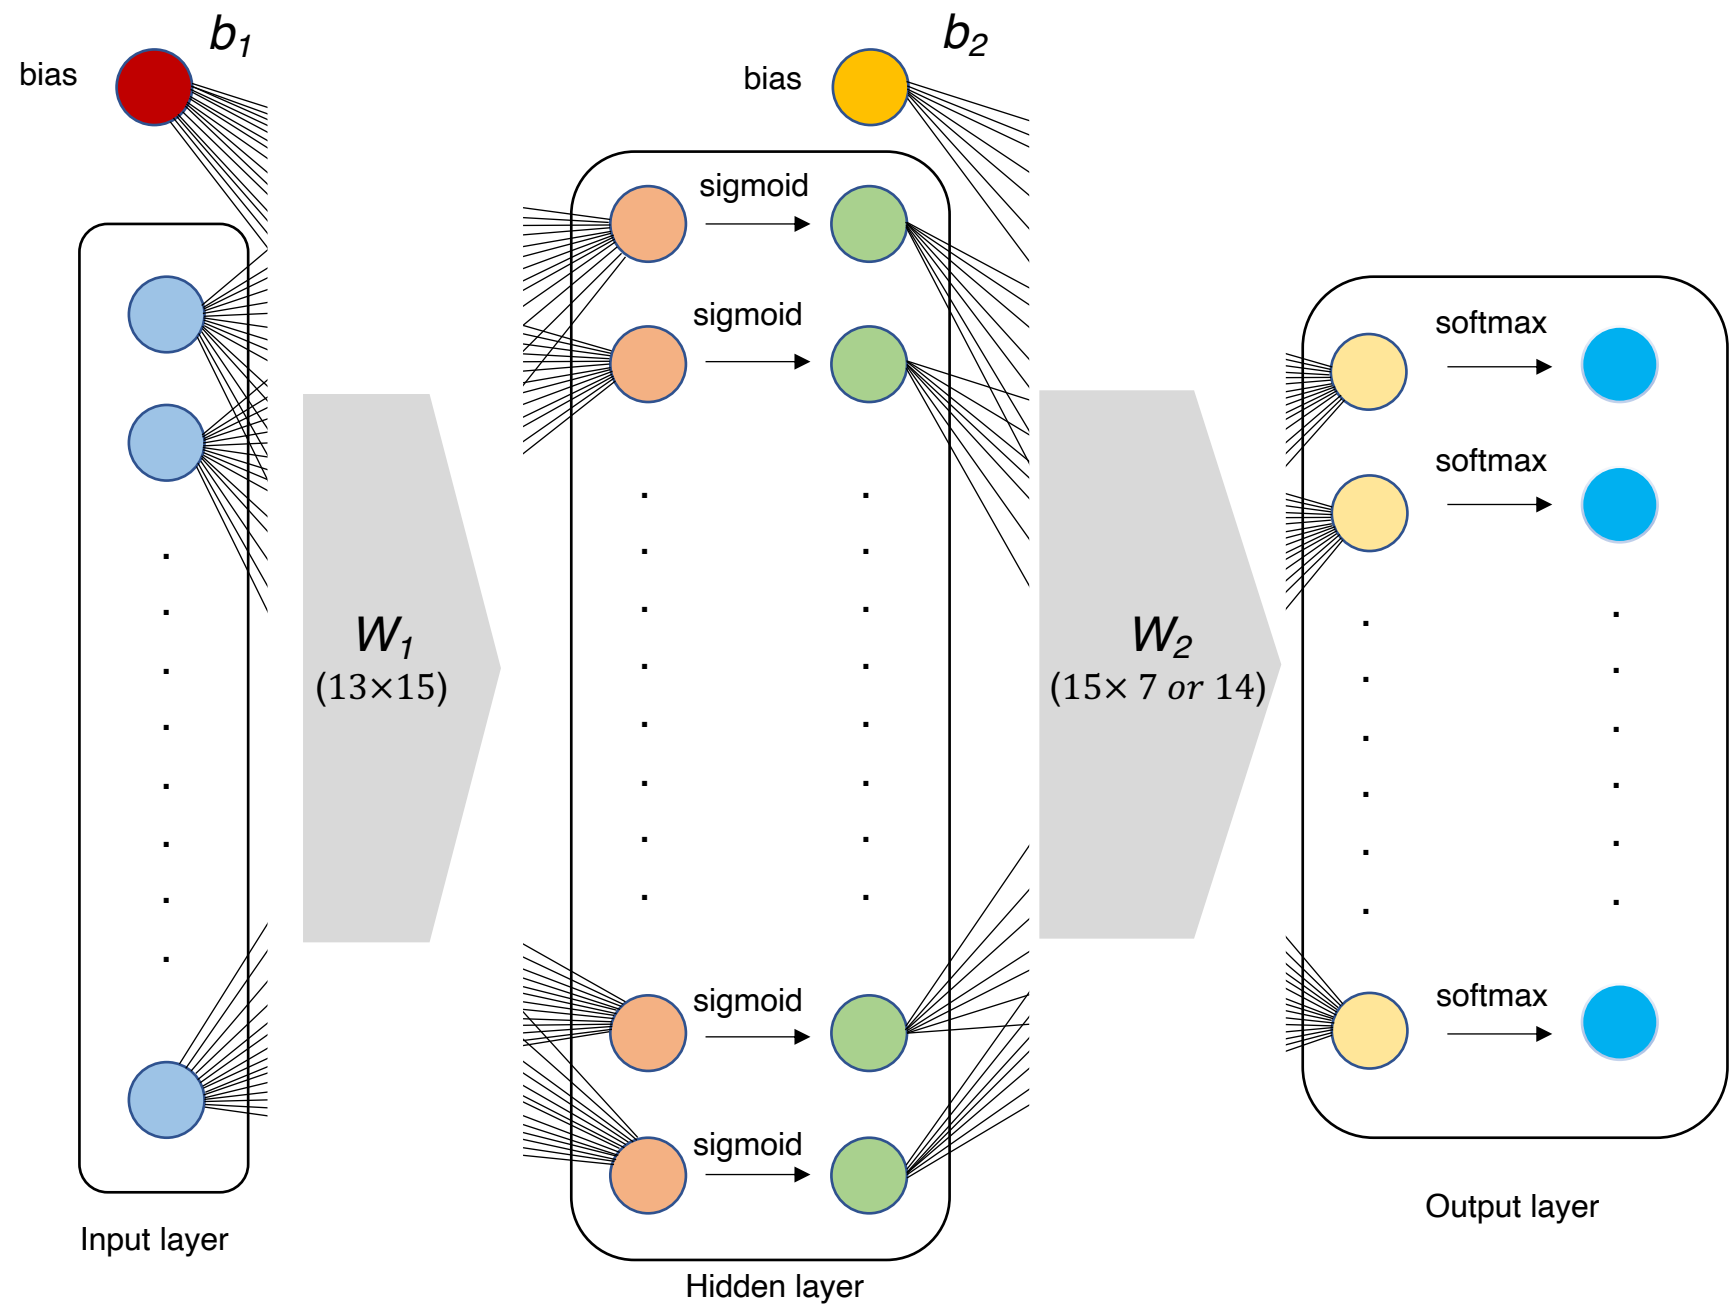

Figure S2. The architecture of the predictive model in this study.

Figure S3

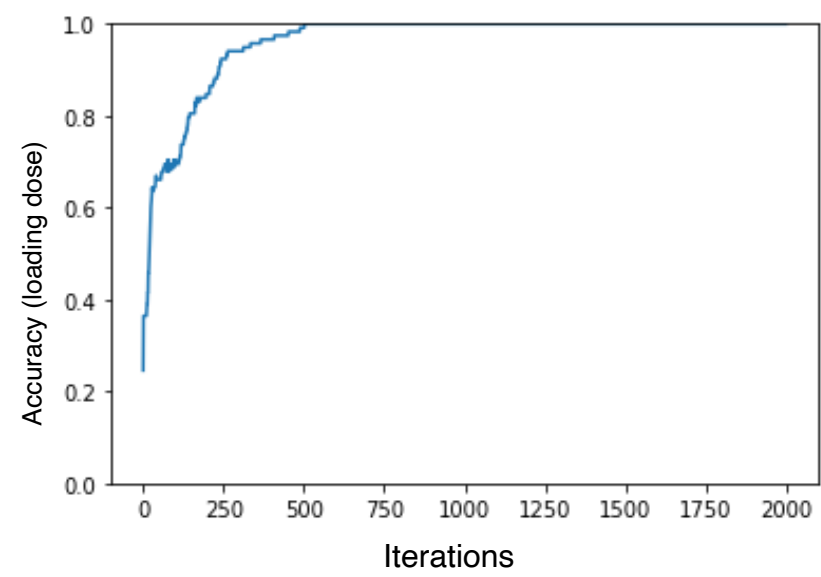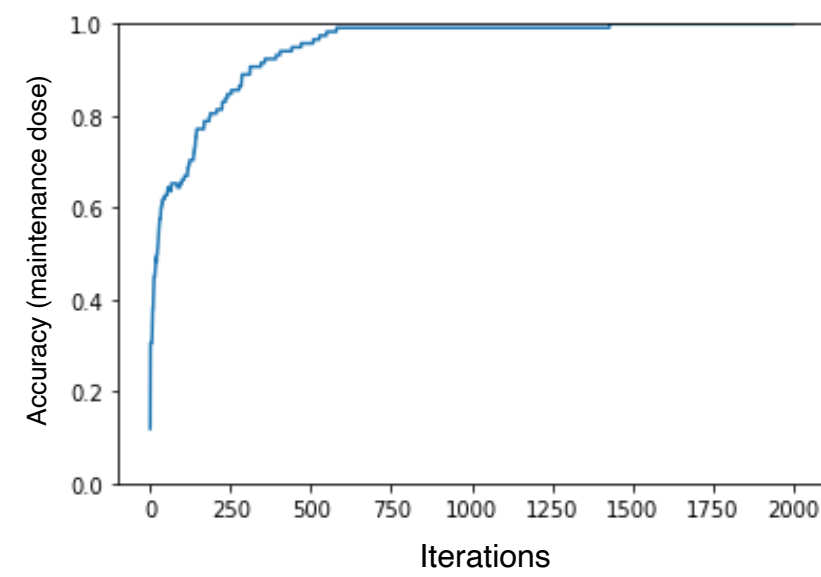

Figure S3. Learning curves of the neural network in Figure 3.
